# Supplementary material
Source: PubMed Central journal article supplement (PMC5816725)
Supplement: NIHMS885100-supplement-Supplementary_Information.pdf [file NIHMS885100-supplement-Supplementary_Information.pdf]

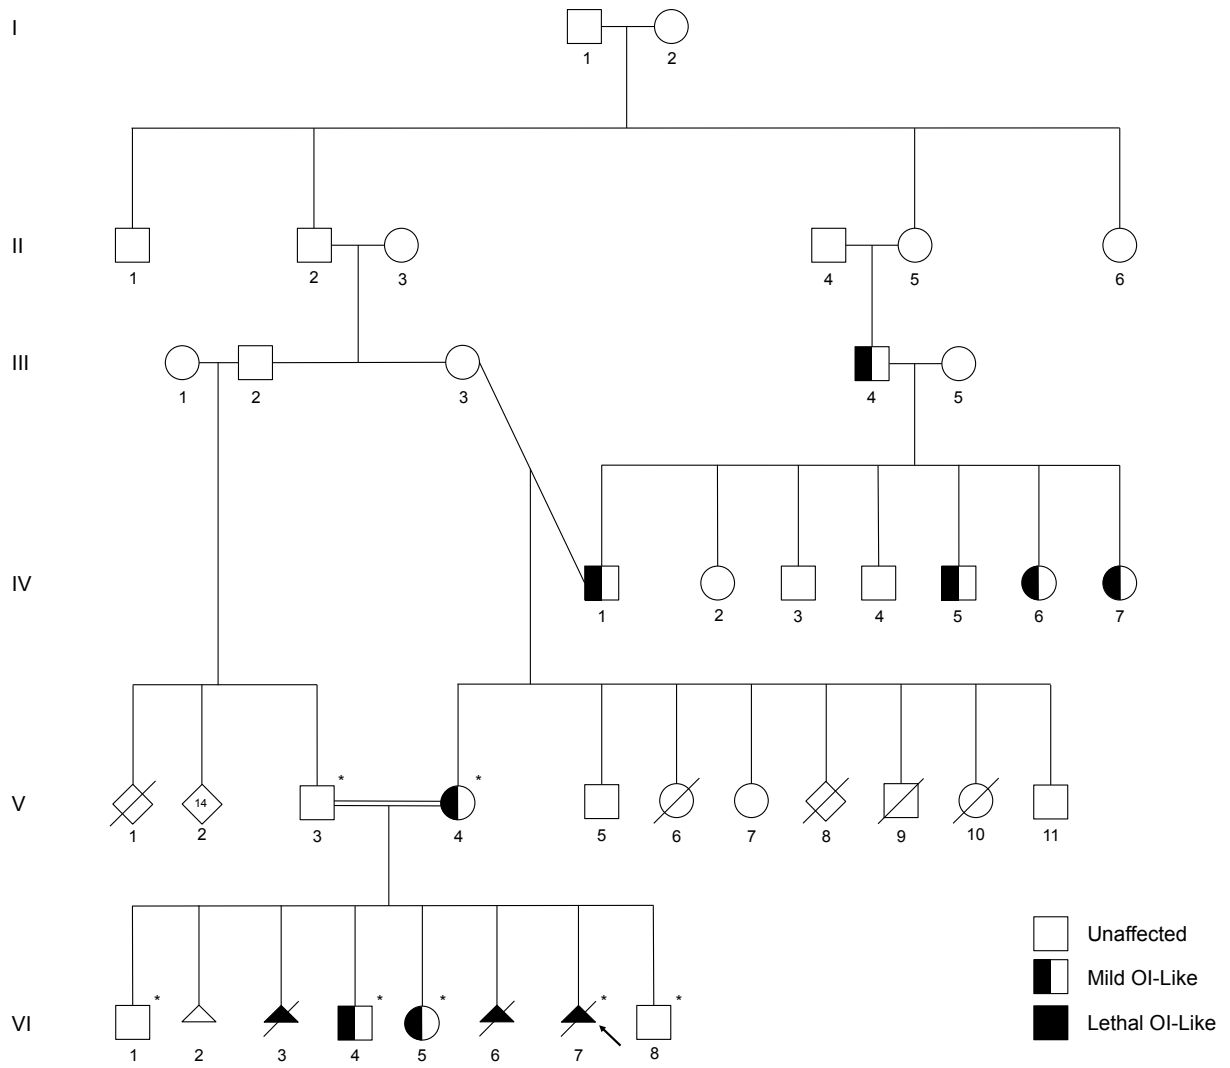

Figure S1. Expanded pedigree of the family. The arrow indicates the proband. Asterisks denote family members who were exomed.

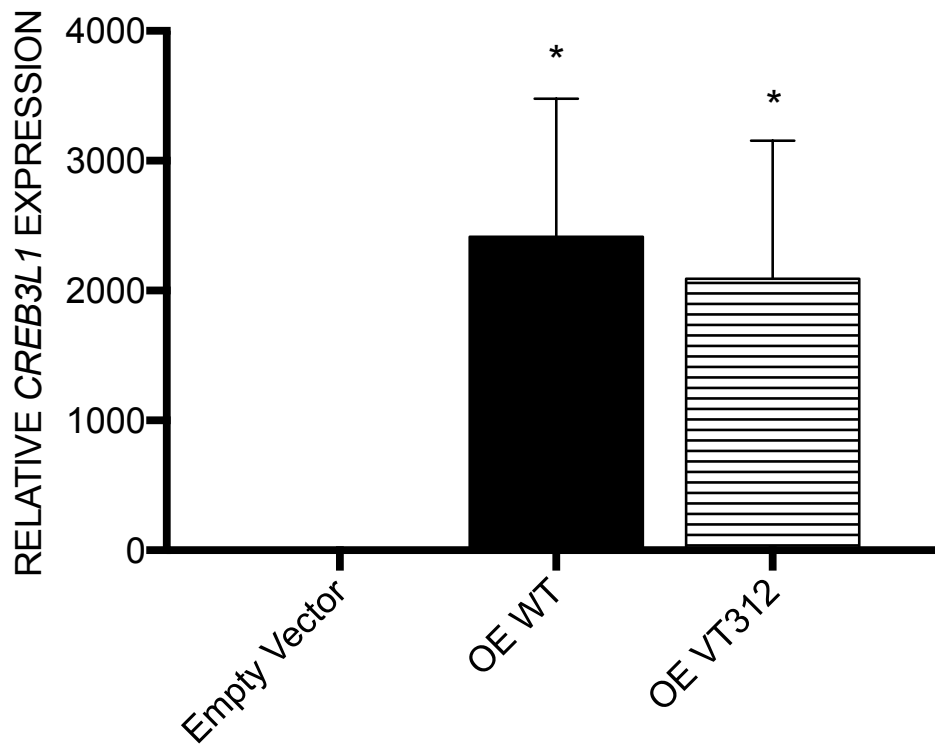

Figure S2. Efficient Transfection Of HEK293. A) *CREB3L1*, either wild type (WT) or variant (VT312), is overexpressed in transfected HEK293. \*P <0.05 versus empty vector-transfected control (Dunnett Test). Y-axes represent relative mRNA expression normalized by the level of GAPDH. Values shown are the means of three independent experiments (n=3). Error bars, S.D. RT-qPCR.

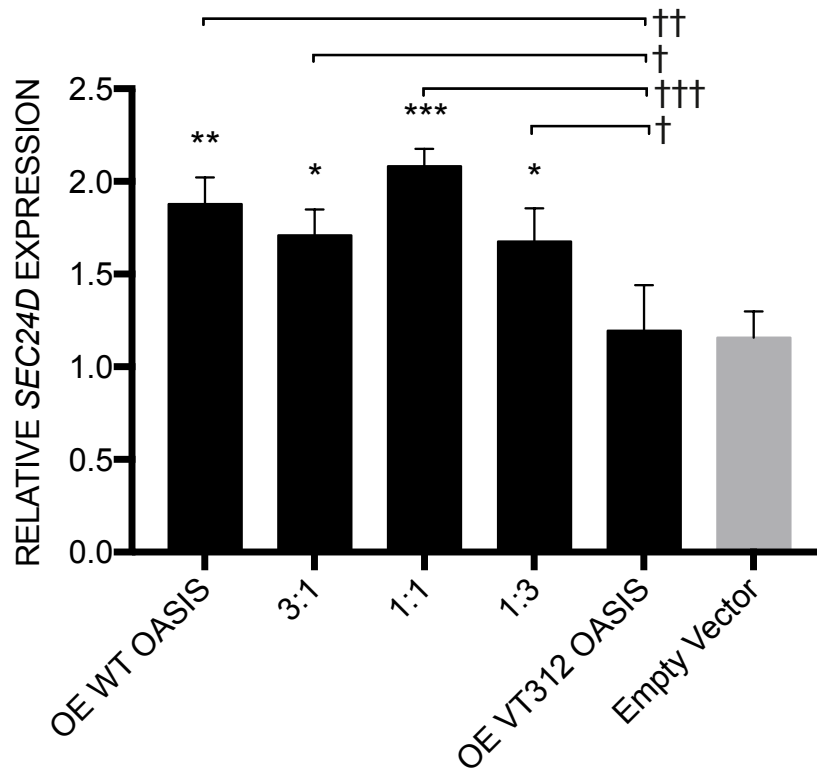

Figure S3. OASIS does not form homodimers. While the presence of any WT OASIS yields higher expression of the target *SEC24D*, there is no correlation between increasing amounts of functional WT OASIS and expression. \*P <0.05; \*\*P <0.01; \*\*\*P <0.001 versus empty vector-transfected control. †P <0.05; ††P <0.01; †††P <0.001 versus the indicated group (Tukey Test). Y-axes represent relative mRNA expression normalized by the level of GAPDH. Values shown are the mean of three independent experiments (n=3). Error bars, S.D. RT-qPCR.

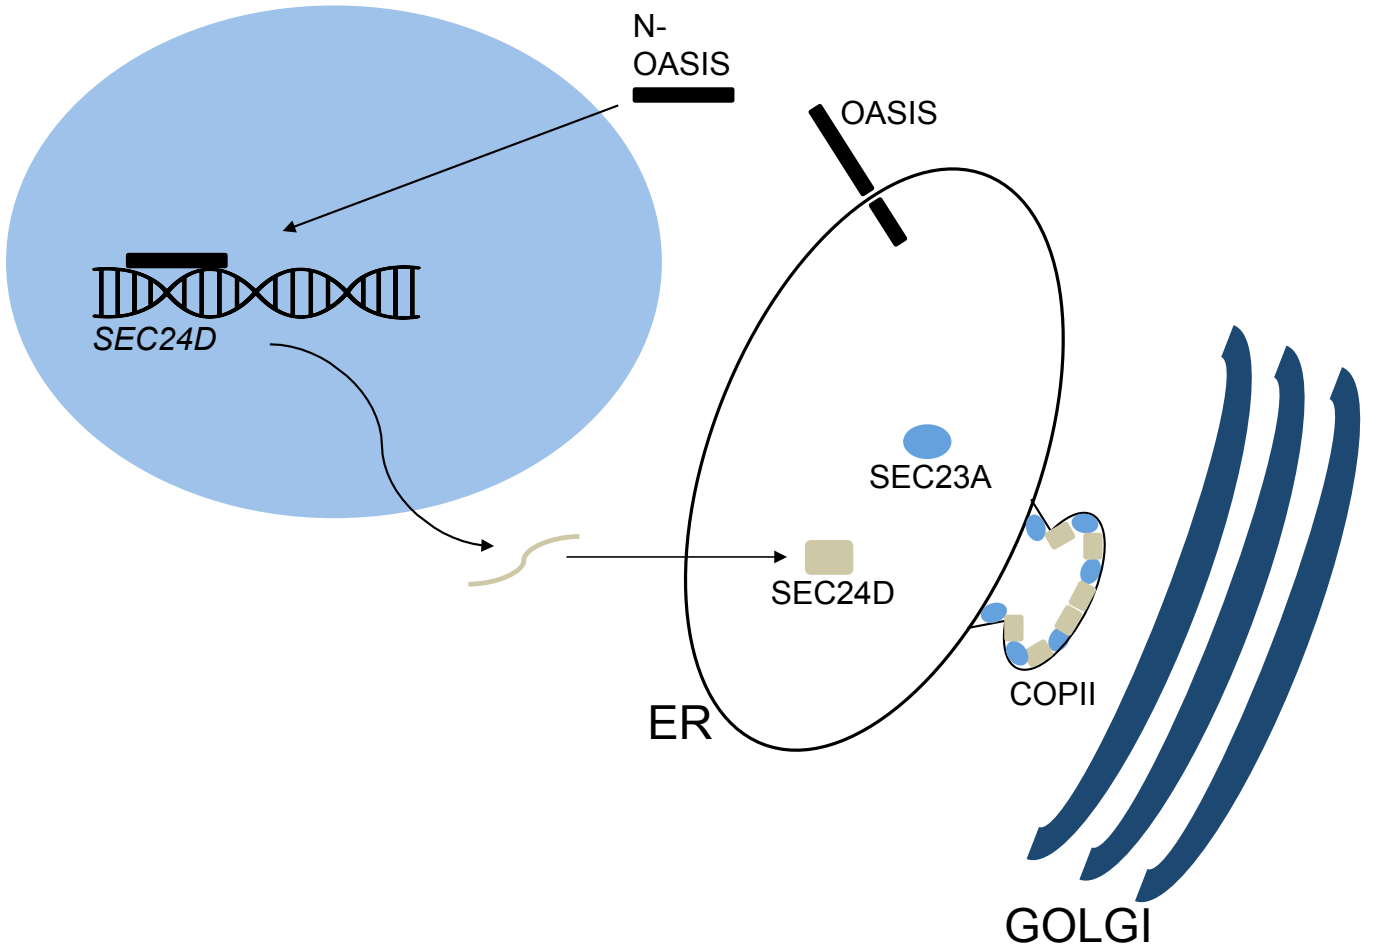

Figure S4. Role of OASIS in osteoblasts. Physiological ER stress associated with osteoblast differentiation and bone formation causes release of full-length OASIS from the RER membrane and eventual cleavage by S1P and S2P. The N-terminal active OASIS fragment moves into the nucleus, where it promotes expression of *SEC24D*, needed to build COPII complexes for the shuttling of secreted bone matrix proteins. OASIS also acts on the *COL1A1* promoter, resulting in increased type I collagen production.<sup>16</sup> The overall effect is production of bone matrix by the cell.

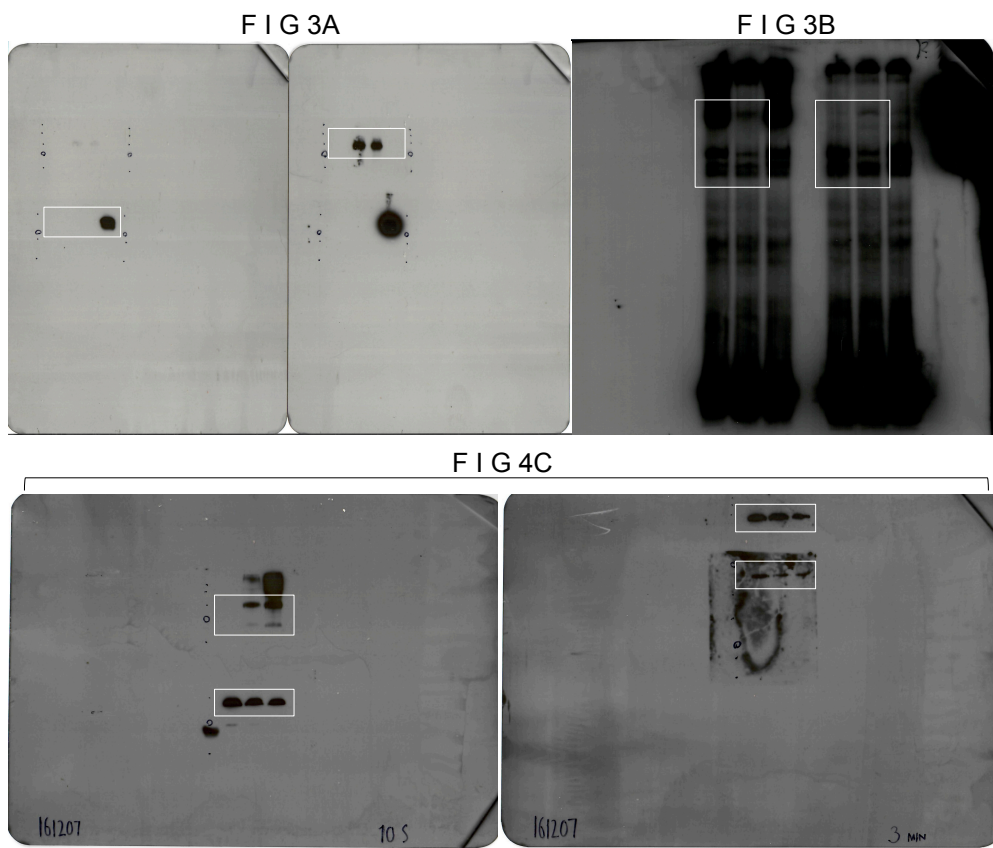

Figure S5. Full scans of films from key figures.

Table S1. Primers Used In This Study

| PRIMER NAME                                                      | SEQUENCE                                                                                                        |
|------------------------------------------------------------------|-----------------------------------------------------------------------------------------------------------------|
| For Sanger confirmation of the <i>CREB3L1</i> variant in exon 7: |                                                                                                                 |
| CREB3L1-i5S                                                      | GCCTTGCCCAGGTCATATAG                                                                                            |
| CREB3L1-i8A                                                      | CTCTCCCCTGTCTCCCAGAG                                                                                            |
| For mutagenesis of WT312 expression vector:                      |                                                                                                                 |
| QuikCREB3L1_del2159-2161                                         | CCAGGAGAGCCGTCGTAAGAAGGAGTATGTGG                                                                                |
| QuikCREB3L1_del2159-2161_anti                                    | CCACATACTCCTTCTTACGACGGCTCTCCTGG                                                                                |
| For PCR assembly of IVT templates:                               |                                                                                                                 |
| T7UP F                                                           | AACGACGGCCAGTGAATTGTAATA                                                                                        |
| IRES R                                                           | ATGGGTGGTGGCCATATTATCATC                                                                                        |
| IVT Sense OASIS                                                  | GATGATAATATGGCCACCACCCATATGGACGCCGTCTTGAA                                                                       |
| IVT Antisense OASIS                                              | TTTTTTTTTTTTTTTTTTTTCTATGATGGTGGTGTGGGGC                                                                        |
| EMSA:                                                            |                                                                                                                 |
| COL1A1 UPRE-Like WT Human<br>(Duplex Oligo)                      | (T O P)<br>CGGCCAGCCGCCAGCCGACGTGGCTCCCTCCCCTTCTGT<br>GCCGGTCGGCCGGTCGGCTGCACCGAGGGAGGGGAAGACA<br>(B O T T O M) |
| RT-qPCR:                                                         |                                                                                                                 |
| QPCR[SEC23A] F                                                   | TCAAGATCTGACCCAGTCTC                                                                                            |
| QPCR[SEC23A] R                                                   | GCATATCCTGGTATCCTGAC                                                                                            |
| QPCR[SEC24D] F                                                   | GATCCTGACTCTATCCCTAGC                                                                                           |
| QPCR[SEC24D] R                                                   | GGTGGCATAAACTTGTCCCTC                                                                                           |
| QPCR[GAPDH] F                                                    | AACGTGTCAGTGGTGGACC                                                                                             |
| QPCR[GAPDH] R                                                    | GACAAAGTGGTCGTTGAGG                                                                                             |
| QPCR[CREB3L1] F                                                  | TTGATGACCCTGTGCTGGAT                                                                                            |
| QPCR[CREB3L1] R                                                  | CATCTTGATGGGCACAAGGG                                                                                            |
